# Supplementary material
Source: publisher figshare collection journal article supplement (https://acs.figshare.com/ndownloader/files/24067624)
Supplement: Supplementary file 1 [file 24067624]

Compound	SMILE
Biotin	C1[C@H]2[C@@H]([C@@H](S1)CCCCC(=O)O)NC(=O)N2
Diaminobiotin	C1[C@@H]([C@@H]([C@@H](S1)CCCCC(=O)O)N)N
